# Supplementary material
Source: PubMed Central journal article supplement (PMC6561804)
Supplement: NIHMS1018757-supplement-Supp_info.pdf [file NIHMS1018757-supplement-Supp_info.pdf]

Supplementary Information

**Role of the Global Regulator Rex in Control of NAD<sup>+</sup>-Regeneration in  
*Clostridioides (Clostridium) difficile***

Laurent Bouillaut<sup>1</sup>, Thomas Dubois<sup>2,3</sup>, Michael B. Francis<sup>4</sup>, Nadine Daou<sup>1</sup>, Marc Monot<sup>2,3</sup>,  
Joseph A. Sorg<sup>4</sup>, Abraham L. Sonenshein<sup>1</sup> and Bruno Dupuy<sup>2,3</sup>

<sup>1</sup>Department of Molecular Biology and Microbiology, Tufts University School of Medicine, Boston, MA 02111, <sup>2</sup>Pathogenesis of Bacterial Anaerobes Laboratory, Institut Pasteur, 75724 Paris, France, <sup>3</sup>Université Paris Diderot, Sorbonne Paris Cité, Paris, France and <sup>4</sup>Department of Biology, Texas A&M University, College Station, TX 77843.

Table S1: Microarray analysis of cells grown in TY medium with and without added proline.

Table S2: Microarray analysis of *prdR* mutant and wild-type cells grown in TY medium supplemented with proline.

Table S3: Microarray analysis of *prdR* mutant and wild-type cells grown in TY medium supplemented with proline.

Table S4. Spore formation by JIR8094 and *prfR* and *rex* mutants.

Table S5: Oligonucleotide primers used in this study (5' to 3').

Fig. S1: Construction the *C. difficile rex* mutants using the TargeTron system.

Fig. S2: Growth curves of the JIR8094 strain and its respective *prdR*, *prdB* and *rex* mutants in both TY medium and TY supplemented with 30 mM L-proline (TYP).

**Supplementary Table S1. Microarray analysis of cells grown in TY medium with and without added proline.**

| Class                 | Group                                 | Gene ID     | Name   | Product                                                                                                                            | TYP/TY | p-value | Reg binding site |
|-----------------------|---------------------------------------|-------------|--------|------------------------------------------------------------------------------------------------------------------------------------|--------|---------|------------------|
| Cell Factor           | GTP-binding_l epA_CD2467              | CD630_24670 | lepA   | GTP-binding protein LepA                                                                                                           | 2.01   | 0.0479  |                  |
| Cell Factor           | Signaling-protein_CD2965              | CD630_29650 |        | Putative signaling protein                                                                                                         | 0.46   | 0.0140  |                  |
| Cell Factor           | Peptidase_M20D_CD3221                 | CD630_32210 |        | Putative peptidase, M20D family                                                                                                    | 0.48   | 0.0032  |                  |
| Cell Factor           | Cyclase_CD1968-1970                   | CD630_19680 |        | Putative membrane protein                                                                                                          | 0.43   | 0.0036  |                  |
| Cell Factor           | Cyclase_CD1968-1970                   | CD630_19690 |        | Putative oligonucleotide binding regulator                                                                                         | 0.41   | 0.0195  |                  |
| Cell Factor           | Cyclase_CD1968-1970                   | CD630_19700 |        | Putative enzyme, cyclase family                                                                                                    | 0.45   | 0.0065  |                  |
| Cell Factor           | Hydrogenase_CD0894                    | CD630_08940 |        | Putative iron-dependent hydrogenase                                                                                                | 0.53   | 0.0017  |                  |
| Cell Wall             | Cell-surface_protein_CD2518           | CD630_25180 | cwp29  | Cell surface protein                                                                                                               | 0.5    | 0.0203  |                  |
| Cell Wall             | Membrane-protein_CD0830               | CD630_08300 |        | Putative membrane protein                                                                                                          | 0.17   | 0.0000  |                  |
| Cell Wall             | Peptidoglycan_synthesis_CD0829        | CD630_08290 |        | Putative metallo-beta-lactamase superfamily protein                                                                                | 0.5    | 0.0200  |                  |
| Cell Wall             | Peptidoglycan_CD1469                  | CD630_14690 | cwp20  | Putative cell surface protein putative penicillin-binding protein                                                                  | 0.31   | 0.0000  |                  |
| Cell Wall             | Cell-surface_protein_CD0514           | CD630_05140 | cwpV   | Cell surface protein                                                                                                               | 0.47   | 0.0023  |                  |
| Fermentation          | Alcohol_production_CD2966             | CD630_29660 | adhE   | Aldehyde-alcohol dehydrogenase                                                                                                     | 0.05   | 0.0273  | Yes              |
| Fermentation          | Butyrate_production_CD1054-1059       | CD630_10540 | bcd2   | Butyryl-CoA dehydrogenase                                                                                                          | 0.04   | 0.0000  | Yes              |
| Fermentation          | Butyrate_production_CD1054-1059       | CD630_10550 | etfB   | Electron transfer flavoproteins subunit beta                                                                                       | 0.03   | 0.0000  |                  |
| Fermentation          | Butyrate_production_CD1054-1059       | CD630_10560 | etfA   | Electron transfer flavoprotein subunit alpha                                                                                       | 0.04   | 0.0000  |                  |
| Fermentation          | Butyrate_production_CD1054-1059       | CD630_10570 | crf2   | 3-hydroxybutyryl-CoA dehydratase (Crotonase)                                                                                       | 0.05   | 0.0000  |                  |
| Fermentation          | Butyrate_production_CD1054-1059       | CD630_10580 | hbd    | 3-hydroxybutyryl-CoA dehydrogenase                                                                                                 | 0.03   | 0.0000  |                  |
| Fermentation          | Butyrate_production_CD1054-1059       | CD630_10590 | thiA1  | Acetoacetyl-CoA thiolase 1                                                                                                         | 0.03   | 0.0000  |                  |
| Fermentation          | Formate_production_CD3282-3283        | CD630_32820 | pflD   | Pyruvate formate-lyase                                                                                                             | 0.35   | 0.0016  |                  |
| Fermentation          | Formate_production_CD3282-3283        | CD630_32830 | pflE   | Pyruvate formate-lyase (activating enzyme)                                                                                         | 0.3    | 0.0000  |                  |
| Fermentation          | Alcohol_dehydrogenase_CD3006          | CD630_30060 |        | Alcohol dehydrogenase                                                                                                              | 3.43   | 0.0001  |                  |
| Fermentation          | Succinate_CD2338-2344                 | CD630_23380 | 4hbD   | 4-hydroxybutyrate dehydrogenase (4-hydroxybutanoate:NAD+ oxidoreductase)                                                           | 0.17   | 0.0000  |                  |
| Fermentation          | Succinate_CD2338-2344                 | CD630_23390 | cat2   | 4-hydroxybutyrate CoA transferase                                                                                                  | 0.15   | 0.0000  |                  |
| Fermentation          | Succinate_CD2338-2344                 | CD630_23400 |        | Conserved hypothetical protein                                                                                                     | 0.15   | 0.0000  |                  |
| Fermentation          | Succinate_CD2338-2344                 | CD630_23410 | abfD   | Gamma-aminobutyrate metabolism dehydratase/isomerase [includes: 4- hydroxybutyryl-coa dehydratase vinylacetyl-coa-delta-isomerase] | 0.13   | 0.0000  |                  |
| Fermentation          | Succinate_CD2338-2344                 | CD630_23420 | sucD   | Succinate-semialdehyde dehydrogenase (NAD(P)+)                                                                                     | 0.05   | 0.0000  |                  |
| Fermentation          | Succinate_CD2338-2344                 | CD630_23430 | cat1   | Succinyl-CoA:coenzyme A transferase                                                                                                | 0.04   | 0.0000  |                  |
| Fermentation          | Succinate_CD2338-2344                 | CD630_23440 |        | Putative membrane protein                                                                                                          | 0.1    | 0.0000  | Yes              |
| Membrane Transport    | ABC_Cobalt_CD0324-0327                | CD630_03240 | cbiM   | Cobalamin biosynthesis protein                                                                                                     | 0.27   | 0.0003  |                  |
| Membrane Transport    | ABC_Cobalt_CD0324-0327                | CD630_03250 | cbiN   | ABC-type transport system, cobalt-specific extracellular solute-binding protein                                                    | 0.25   | 0.0006  |                  |
| Membrane Transport    | ABC_Cobalt_CD0324-0327                | CD630_03260 | cbiQ   | ABC-type transport system, cobalt-specific permease                                                                                | 0.29   | 0.0010  |                  |
| Membrane Transport    | ABC_Cobalt_CD0324-0327                | CD630_03270 | cbiO   | ABC-type transport system, cobalt-specific ATP-binding protein                                                                     | 0.28   | 0.0015  |                  |
| Membrane Transport    | Symporter_Sodium-dicarboxylate_CD2541 | CD630_25410 |        | Sodium:glutamate/aspartate symporter family                                                                                        | 0.37   | 0.0086  |                  |
| Membrane Transport    | Carbohydrate_transport_CD3017         | CD630_30170 |        | Putative glucose uptake protein                                                                                                    | 1.96   | 0.0014  |                  |
| Membrane Transport    | MFS_CD3036                            | CD630_30360 |        | Transporter, Major Facilitator Superfamily (MFS)                                                                                   | 6.03   | 0.0001  |                  |
| Membrane Transport    | Antiporter_CD2102                     | CD630_21020 |        | Putative Na(+)/H(+) antiporter                                                                                                     | 2.07   | 0.0080  |                  |
| Membrane Transport    | ATP_synthase_CD2954-2961              | CD630_29540 | atpD   | V-type ATP synthase subunit D                                                                                                      | 0.19   | 0.0001  |                  |
| Membrane Transport    | ATP_synthase_CD2954-2961              | CD630_29550 | atpB   | V-type ATP synthase beta chain (V-type ATPase subunit B)                                                                           | 0.15   | 0.0000  |                  |
| Membrane Transport    | ATP_synthase_CD2954-2961              | CD630_29560 | atpA   | V-type ATP synthase alpha chain (V-type ATPase subunit A)                                                                          | 0.13   | 0.0000  |                  |
| Membrane Transport    | ATP_synthase_CD2954-2961              | CD630_29561 | atpF   | V-type ATP synthase subunit F                                                                                                      | 0.14   | 0.0001  |                  |
| Membrane Transport    | ATP_synthase_CD2954-2961              | CD630_29570 | atpC   | V-type ATP synthase subunit C                                                                                                      | 0.15   | 0.0000  |                  |
| Membrane Transport    | ATP_synthase_CD2954-2961              | CD630_29580 | atpE   | V-type ATP synthase subunit E (V-type ATPase subunit E)                                                                            | 0.14   | 0.0000  |                  |
| Membrane Transport    | ATP_synthase_CD2954-2961              | CD630_29590 | atpK   | V-type ATP synthase subunit K                                                                                                      | 0.13   | 0.0000  |                  |
| Membrane Transport    | ATP_synthase_CD2954-2961              | CD630_29600 | atpI   | V-type sodium ATP synthase subunit I                                                                                               | 0.16   | 0.0001  |                  |
| Membrane Transport    | ATP_synthase_CD2954-2961              | CD630_29610 |        | Conserved hypothetical protein                                                                                                     | 0.16   | 0.0000  |                  |
| Membrane Transport    | Permease_CD1555                       | CD630_15550 |        | Putative amino acid permease                                                                                                       | 2.33   | 0.0021  |                  |
| Membrane Transport    | Antiporter_CD2874                     | CD630_28740 |        | Putative drug/sodium antiporter, MATE family                                                                                       | 0.47   | 0.0396  |                  |
| Membrane Transport    | ABC_CD0873-CD0875                     | CD630_08730 |        | ABC-type transport system, sugar-family extracellular solute-binding protein                                                       | 2.05   | 0.0196  |                  |
| Membrane Transport    | ABC_CD0873-CD0875                     | CD630_08740 |        | ABC-type transport system, sugar-family extracellular solute-binding protein                                                       | 2.34   | 0.0008  |                  |
| Metabolism Amino Acid | Cysteine_synthase_CD1594-CD1595       | CD630_15940 | cysK   | O-acetyl-serine thiol-lyase A (O-acetyl-sulphydrylase)(OAS-TL)                                                                     | 4.59   | 0.0015  |                  |
| Metabolism Amino Acid | Cysteine_synthase_CD1594-CD1595       | CD630_15950 | cysE   | Serine acetyltransferase (SAT)                                                                                                     | 5.82   | 0.0000  |                  |
| Metabolism Amino Acid | Proline_utilization_CD3236-3244       | CD630_32360 |        | Putative membrane protein                                                                                                          | 64.29  | 0.0000  |                  |
| Metabolism Amino Acid | Proline_utilization_CD3236-3244       | CD630_32370 | prdF   | Proline racemase                                                                                                                   | 54.08  | 0.0000  |                  |
| Metabolism Amino Acid | Proline_utilization_CD3236-3244       | CD630_32380 |        | Putative component of proline reductase prdE-like                                                                                  | 41.76  | 0.0000  |                  |
| Metabolism Amino Acid | Proline_utilization_CD3236-3244       | CD630_32390 | prdE   | Proline reductase PrdE                                                                                                             | 30.31  | 0.0000  |                  |
| Metabolism Amino Acid | Proline_utilization_CD3236-3244       | CD630_32400 | prdD   | Proline reductase PrdD                                                                                                             | 34.1   | 0.0000  |                  |
| Metabolism Amino Acid | Proline_utilization_CD3236-3244       | CD630_32410 | prdB   | Proline reductase (selenocysteine)                                                                                                 | 45.54  | 0.0000  |                  |
| Metabolism Amino Acid | Proline_utilization_CD3236-3244       | CD630_32420 |        | Conserved hypothetical protein                                                                                                     | 61.03  | 0.0000  |                  |
| Metabolism Amino Acid | Proline_utilization_CD3236-3244       | CD630_32440 | prdA   | D-proline reductase propionin prdA                                                                                                 | 51.7   | 0.0000  |                  |
| Metabolism Amino Acid | Glycine_decarboxylase_CD1657-1658     | CD630_16570 | gcvTPA | Bi-functional glycine dehydrogenase/aminomethyl transferase protein                                                                | 0.37   | 0.0027  |                  |
| Metabolism Amino Acid | Glycine_decarboxylase_CD1657-1658     | CD630_16580 | gcvPB  | Glycine decarboxylase                                                                                                              | 0.41   | 0.0006  |                  |
| Metabolism Amino Acid | Glycine_utilization_CD2348-2358       | CD630_23480 | grdD   | Glycine reductase complex component C subunit alpha (Protein PC alpha)                                                             | 0.05   | 0.0000  |                  |
| Metabolism Amino Acid | Glycine_utilization_CD2348-2358       | CD630_23490 | grdC   | Glycine reductase complex component C subunit beta (Protein PC beta)                                                               | 0.05   | 0.0000  |                  |
| Metabolism Amino Acid | Glycine_utilization_CD2348-2358       | CD630_23510 | grdB   | Glycine reductase complex component B gamma subunit (selenocysteine)                                                               | 0.04   | 0.0000  |                  |
| Metabolism Amino Acid | Glycine_utilization_CD2348-2358       | CD630_23520 | grdA   | Glycine reductase complex selenoprotein A (selenocysteine)                                                                         | 0.04   | 0.0000  |                  |

|                         |                                           |             |       |                                                                                                                                      |      |        |     |
|-------------------------|-------------------------------------------|-------------|-------|--------------------------------------------------------------------------------------------------------------------------------------|------|--------|-----|
| Metabolism Amino Acid   | Glycine_utilization_CD2348-2358           | CD630_23540 | grdE  | Glycine reductase complex component B subunits alpha and beta (Selenoprotein PB alpha/beta) [Contains: Betaine reductase component B | 0.06 | 0.0000 | Yes |
| Metabolism Amino Acid   | Glycine_utilization_CD2348-2358           | CD630_23550 | trxA2 | Thioredoxin 2 (Trx2)                                                                                                                 | 0.05 | 0.0000 |     |
| Metabolism Amino Acid   | Glycine_utilization_CD2348-2358           | CD630_23560 | trxB3 | Thioredoxin reductase 3                                                                                                              | 0.05 | 0.0000 |     |
| Metabolism Amino Acid   | Glycine_utilization_CD2348-2358           | CD630_23570 | grdX  | Putative glycine reductase complex component                                                                                         | 0.1  | 0.0001 |     |
| Metabolism Amino Acid   | Glycine_utilization_CD2348-2358           | CD630_23580 |       | Oligoendopeptidase-related, clade2, M3B family                                                                                       | 0.49 | 0.0011 |     |
| Metabolism Amino Acid   | Glutamate_synthase_CD0828                 | CD630_08280 |       | Putative oxidative stress glutamate synthase                                                                                         | 0.44 | 0.0447 |     |
| Metabolism Amino Acid   | Serine_biosynthesis_CD0994-0996           | CD630_09940 |       | Putative serine-pyruvate aminotransferase                                                                                            | 0.19 | 0.0011 |     |
| Metabolism Amino Acid   | Serine_biosynthesis_CD0994-0996           | CD630_09950 | serA  | Putative D-3-phosphoglycerate dehydrogenase                                                                                          | 0.11 | 0.0000 |     |
| Metabolism Amino Acid   | Serine_biosynthesis_CD0994-0996           | CD630_09960 |       | Conserved hypothetical protein                                                                                                       | 0.21 | 0.0005 |     |
| Metabolism Amino Acid   | Aminobutyrate_hydrolase_CD3093            | CD630_30930 |       | Putative gamma-glutamyl-gamma-aminobutyrate hydrolase                                                                                | 0.39 | 0.0006 |     |
| Metabolism Carbon       | CO_dehydrogenase_CD0716-CD0717            | CD630_07160 | cooS  | Bifunctional carbon monoxide dehydrogenase/acetyl-CoA synthase (CODH)                                                                | 0.32 | 0.0018 |     |
| Metabolism Carbon       | CO_dehydrogenase_CD0716-CD0717            | CD630_07170 |       | Bifunctional carbon monoxide dehydrogenase/acetyl-CoA synthase, accessory protein                                                    | 0.3  | 0.0001 |     |
| Metabolism Carbon       | Nitrogen_degradation_CD1384-CD1387        | CD630_13840 |       | Putative lamB-like protein, UPF0271 family                                                                                           | 0.32 | 0.0001 |     |
| Metabolism Carbon       | Nitrogen_degradation_CD1384-CD1387        | CD630_13850 |       | Putative natural resistance-associated macrophage protein                                                                            | 0.27 | 0.0001 |     |
| Metabolism Carbon       | Nitrogen_degradation_CD1384-CD1387        | CD630_13860 |       | Putative allophanate hydrolase subunit 1                                                                                             | 0.38 | 0.0008 |     |
| Metabolism Carbon       | Nitrogen_degradation_CD1384-CD1387        | CD630_13870 |       | Putative allophanate hydrolase subunit 2                                                                                             | 0.29 | 0.0000 |     |
| Metabolism Carbon       | Carbohydrate_hydrolase_CD3001-CD3004      | CD630_30010 |       | Putative hydrolase/isomerase/hydratase                                                                                               | 3.39 | 0.0000 |     |
| Metabolism Carbon       | Carbohydrate_hydrolase_CD3001-CD3004      | CD630_30020 | uxaA  | D-galactate dehydratase/Altronan hydrolase                                                                                           | 4.12 | 0.0000 |     |
| Metabolism Carbon       | Carbohydrate_hydrolase_CD3001-CD3004      | CD630_30030 |       | Putative N-terminus region of carbohydrate hydrolase, SAF domain                                                                     | 6.1  | 0.0033 |     |
| Metabolism Carbon       | Carbohydrate_hydrolase_CD3001-CD3004      | CD630_30040 | kdgT2 | 2-keto-3-deoxygluconate permease 2                                                                                                   | 6.36 | 0.0025 |     |
| Metabolism Carbon       | Polysaccharide_deacetylase_CD3248         | CD630_32480 |       | Polysaccharide deacetylase                                                                                                           | 7    | 0.0000 |     |
| Metabolism Cofactor     | Iron-molybdenum_dinitrogenase_CD1693      | CD630_16930 |       | Putative dinitrogenase iron-molybdenum cofactor                                                                                      | 0.45 | 0.0023 |     |
| Metabolism Cofactor     | CoA_reductase_CD2540                      | CD630_25400 |       | Coenzyme A disulfide reductase                                                                                                       | 0.24 | 0.0313 |     |
| Metabolism Nucleic Acid | Ribonucleoside_reductase_CD2994-2995      | CD630_29940 | nrpF  | Ribonucleoside-diphosphate reductase subunit beta (Ribonucleotide reductase small subunit)                                           | 0.23 | 0.0001 |     |
| Metabolism Nucleic Acid | Ribonucleoside_reductase_CD2994-2995      | CD630_29950 | nrpE  | Ribonucleoside-diphosphate reductase subunit alpha (Ribonucleotide reductase large subunit)                                          | 0.24 | 0.0000 |     |
| Metabolism Nucleic Acid | dCMP-deaminase_CD1899                     | CD630_18990 |       | Putative dCMP deaminase                                                                                                              | 0.5  | 0.0014 |     |
| Metabolism Nucleic Acid | Xanthine_utilization_CD2099-CD2101        | CD630_20990 | XdhD  | Xanthine dehydrogenase subunit XdhD, molybdopterin-binding                                                                           | 1.62 | 0.0107 |     |
| Metabolism Nucleic Acid | Xanthine_utilization_CD2099-CD2101        | CD630_21000 | XdhC3 | Xanthine dehydrogenase iron-sulfur binding subunit XdhC3                                                                             | 2.14 | 0.0089 |     |
| Metabolism Nucleic Acid | Xanthine_utilization_CD2099-CD2101        | CD630_21010 | xdhB  | Xanthine dehydrogenase subunit XdhB, FAD-binding                                                                                     | 1.88 | 0.0022 |     |
| Regulations             | TR_ArsR_CD1692                            | CD630_16920 |       | Transcriptional regulator, ArsR family                                                                                               | 0.49 | 0.0025 |     |
| Regulations             | Diguanylate_kinase_signaling_protein_CD15 | CD630_15380 |       | Putative signaling protein                                                                                                           | 0.49 | 0.0155 |     |
| Regulations             | TR_prdR_CD3245                            | CD630_32450 | prdR  | Transcriptional regulator, sigma-54-dependent                                                                                        | 3.44 | 0.0001 |     |
| Regulations             | TR_LysR_CD2345                            | CD630_23450 |       | Transcriptional regulator, LysR family                                                                                               | 0.34 | 0.0022 |     |
| Regulations             | SigA_CD1498                               | CD630_14980 | sigA2 | RNA polymerase sigma factor SigA2 (sigma-43)                                                                                         | 0.49 | 0.0107 |     |
| Respiration Anaerobic   | Electron_transport_CD3247                 | CD630_32470 | prdC  | Putative electron transfer protein                                                                                                   | 36.1 | 0.0000 |     |
| Respiration Anaerobic   | NO_reductase_CD1623                       | CD630_16230 |       | Putative oxidoreductase                                                                                                              | 0.29 | 0.0001 |     |
| Respiration Anaerobic   | Fe-S_oxidoreductase_CD2178-2179           | CD630_21780 |       | Putative oxidoreductase, Fe-S subunit                                                                                                | 2.34 | 0.0008 |     |
| Respiration Anaerobic   | Fe-S_oxidoreductase_CD2178-2179           | CD630_21790 |       | Putative anaerobic dehydrogenase                                                                                                     | 2.28 | 0.0010 |     |
| Respiration Anaerobic   | Electron_transport_CD2682                 | CD630_26820 | pfo   | Pyruvate-ferredoxin oxidoreductase                                                                                                   | 0.5  | 0.0117 |     |
| Secretion               | Exported-protein_CD0738                   | CD630_07380 |       | Putative exported protein                                                                                                            | 2.12 | 0.0090 |     |
| Sporulation             | Lysine_synthase_CD3000                    | CD630_30000 | dapA1 | Dihydrodipicolinate synthase 1                                                                                                       | 2.83 | 0.0009 |     |
| Sporulation             | SpoV-Cortex_synthase_CD3516               | CD630_35160 | spoVG | Regulator required for spore cortex synthesis                                                                                        | 0.46 | 0.0055 |     |
| Stress                  | Methionine-sulfoxide_reductase_CD2166     | CD630_21660 | msrAB | Peptide methionine sulfoxide reductase MsrA/MsrB                                                                                     | 0.48 | 0.0028 |     |
| Stress                  | Beta-lactamase_CD0895                     | CD630_08950 |       | Metallo-beta-lactamase superfamily exported protein                                                                                  | 0.46 | 0.0009 |     |
| Stress                  | Tellurium_resistance_CD1652               | CD630_16520 |       | Putative tellurium resistance protein                                                                                                | 0.46 | 0.0054 |     |
| Translation             | tRNA-Proline_biosynthesis_CD0049          | CD630_00490 | proS  | Prolyl-tRNA synthetase                                                                                                               | 0.41 | 0.0002 |     |
| Translation             | tRNA-Proline_biosynthesis_CD0050          | CD630_00500 | proS  | Prolyl-tRNA synthetase                                                                                                               | 0.36 | 0.0002 |     |
| Translation             | Elongation_CD0022                         | CD630_00220 | fusA1 | Elongation factor G (EF-G)                                                                                                           | 0.42 | 0.0051 |     |
| Translation             | tRNA-synthetase_CD1053                    | CD630_10530 |       | Putative aminoacyl-tRNA synthetase-associated domain                                                                                 | 0.36 | 0.0001 |     |
| UNKNOWN                 | CHP_CD2627                                | CD630_26270 |       | Conserved hypothetical protein                                                                                                       | 0.47 | 0.0005 |     |
| UNKNOWN                 | CHP_CD0519                                | CD630_05190 |       | Conserved hypothetical protein                                                                                                       | 0.45 | 0.0085 |     |
| UNKNOWN                 | CHP_CD1900                                | CD630_19000 |       | Conserved hypothetical protein                                                                                                       | 0.49 | 0.0014 |     |
| UNKNOWN                 | CHP_CD1568                                | CD630_15680 |       | Conserved hypothetical protein                                                                                                       | 0.44 | 0.0005 |     |
| UNKNOWN                 | CHP_CD3325                                | CD630_33250 |       | Conserved hypothetical protein                                                                                                       | 0.51 | 0.0015 |     |
| UNKNOWN                 | CHP_CD2993                                | CD630_29930 |       | Conserved hypothetical protein                                                                                                       | 0.22 | 0.0000 |     |
| UNKNOWN                 | CHP_CD3234                                | CD630_32340 |       | Conserved hypothetical protein                                                                                                       | 3.12 | 0.0275 |     |
| UNKNOWN                 | CHP_CD1778                                | CD630_17780 |       | Conserved hypothetical protein                                                                                                       | 0.39 | 0.0001 |     |
| UNKNOWN                 | CHP_CD1622                                | CD630_16220 |       | Conserved hypothetical protein                                                                                                       | 0.48 | 0.0009 |     |
| UNKNOWN                 | CHP_CD1779                                | CD630_17790 |       | Conserved hypothetical protein                                                                                                       | 0.45 | 0.0017 |     |
| UNKNOWN                 | CHP_CD0807                                | CD630_08070 |       | Conserved hypothetical protein                                                                                                       | 0.37 | 0.0226 |     |
| UNKNOWN                 | CHP_CD0808                                | CD630_08080 |       | Conserved hypothetical protein                                                                                                       | 0.43 | 0.0011 |     |
| UNKNOWN                 | CHP_CD3252                                | CD630_32520 |       | Conserved hypothetical protein                                                                                                       | 5.65 | 0.0000 |     |
| UNKNOWN                 | CHP_CD2962                                | CD630_29620 |       | Conserved hypothetical protein                                                                                                       | 0.39 | 0.0031 |     |
| UNKNOWN                 | CHP_CD1897                                | CD630_18970 |       | Conserved hypothetical protein                                                                                                       | 0.44 | 0.0011 |     |
| UNKNOWN                 | CHP_CD2626                                | CD630_26260 |       | Conserved hypothetical protein                                                                                                       | 0.43 | 0.0008 |     |
| UNKNOWN                 | CHP_CD1660                                | CD630_16600 |       | Conserved hypothetical protein, DUF 1255 family                                                                                      | 2.02 | 0.0017 |     |

**Supplementary Table S2. Microarray analysis of *prdR* mutant and wild-type cells grown in TY medium supplemented with proline.**

| Class              | Group                                  | Gene ID     | Name  | Product                                                                                                                           | prdR/WT | pvalue | Reg binding site |
|--------------------|----------------------------------------|-------------|-------|-----------------------------------------------------------------------------------------------------------------------------------|---------|--------|------------------|
| Cell Factor        | Hydrogenase_CD0894                     | CD630_08940 |       | Putative iron-dependent hydrogenase                                                                                               | 2.02    | 0.0015 |                  |
| Cell Factor        | Redox_CD3018                           | CD630_30180 |       | Putative redox-active protein                                                                                                     | 0.3     | 0.0001 |                  |
| Cell Factor        | Hydrolase_CD2480                       | CD630_24800 |       | Putative hydrolase                                                                                                                | 2.75    | 0.0003 |                  |
| Cell Wall          | Peptidoglycan_synthesis_CD2664         | CD630_26640 | murE  | UDP-N-acetylmuramyl-tripeptide synthetase                                                                                         | 0.27    | 0.0000 |                  |
| Cell Wall          | Membrane-protein_CD0830                | CD630_08300 |       | Putative membrane protein                                                                                                         | 3.72    | 0.0001 |                  |
| Cell Wall          | Teichoic-acid_biosynthesis_CD2851-2854 | CD630_28510 | dltC  | D-alanine-poly(phosphoribitol) ligase subunit 2 (D-alanyl carrier protein) (DCP)                                                  | 0.45    | 0.0008 |                  |
| Cell Wall          | Teichoic-acid_biosynthesis_CD2851-2854 | CD630_28520 | dltB  | D-alanyl transferase DltB, MBOAT family                                                                                           | 0.39    | 0.0004 |                  |
| Cell Wall          | Teichoic-acid_biosynthesis_CD2851-2854 | CD630_28530 | dltA  | D-alanine-poly(phosphoribitol) ligase subunit 1                                                                                   | 0.33    | 0.0001 |                  |
| Cell Wall          | Teichoic-acid_biosynthesis_CD2851-2854 | CD630_28540 | dltD  | D-alanine transferase DltD                                                                                                        | 0.41    | 0.0016 |                  |
| Cell Wall          | Membrane-protein_CD1413                | CD630_14130 |       | Putative membrane protein                                                                                                         | 6.11    | 0.0000 |                  |
| Fermentation       | Succinate_CD2338-2344                  | CD630_23380 | 4hbD  | 4-hydroxybutyrate dehydrogenase (4-hydroxybutanoate:NAD+ oxidoreductase)                                                          | 3.33    | 0.0012 |                  |
| Fermentation       | Succinate_CD2338-2344                  | CD630_23390 | cat2  | 4-hydroxybutyrate CoA transferase                                                                                                 | 4.39    | 0.0046 |                  |
| Fermentation       | Succinate_CD2338-2344                  | CD630_23400 |       | Conserved hypothetical protein                                                                                                    | 3.1     | 0.0063 |                  |
| Fermentation       | Succinate_CD2338-2344                  | CD630_23410 | abfD  | Gamma-aminobutyrate metabolism dehydratase/isomerase [includes: 4-hydroxybutyryl-coa dehydratase vinylacetyl-coa-delta-isomerase] | 4.12    | 0.0016 |                  |
| Fermentation       | Succinate_CD2338-2344                  | CD630_23420 | sucD  | Succinate-semialdehyde dehydrogenase (NAD(P)+)                                                                                    | 10.44   | 0.0000 |                  |
| Fermentation       | Succinate_CD2338-2344                  | CD630_23430 | cat1  | Succinyl-CoA:coenzyme A transferase                                                                                               | 10.4    | 0.0000 |                  |
| Fermentation       | Succinate_CD2338-2344                  | CD630_23440 |       | Putative membrane protein                                                                                                         | 4.52    | 0.0002 | Yes              |
| Fermentation       | Alcohol_dehydrogenase_CD3006           | CD630_30060 |       | Alcohol dehydrogenase                                                                                                             | 0.22    | 0.0000 |                  |
| Fermentation       | Butyrate_production_CD2379-2382        | CD630_23790 | buk   | Butyrate kinase (Branched-chain carboxylic acid kinase) (BK)                                                                      | 0.26    | 0.0000 |                  |
| Fermentation       | Butyrate_production_CD2379-2382        | CD630_23800 | iorB  | Indole pyruvate ferredoxin/ferredoxin oxidoreductase                                                                              | 0.22    | 0.0000 |                  |
| Fermentation       | Butyrate_production_CD2379-2382        | CD630_23810 | iorA  | Indole pyruvate ferredoxin/ferredoxin oxidoreductase                                                                              | 0.23    | 0.0000 |                  |
| Fermentation       | Butyrate_production_CD2379-2382        | CD630_23820 |       | Putative pyridoxal phosphate-dependent transferase                                                                                | 0.22    | 0.0000 |                  |
| Fermentation       | Alcohol_production_CD2966              | CD630_29660 | adhE  | Aldehyde-alcohol dehydrogenase                                                                                                    | 12.77   | 0.0000 | Yes              |
| Fermentation       | Butyrate_production_CD1054-1059        | CD630_10540 | bcd2  | Butyryl-CoA dehydrogenase                                                                                                         | 6.68    | 0.0000 | Yes              |
| Fermentation       | Butyrate_production_CD1054-1059        | CD630_10550 | etfB  | Electron transfer flavoproteins subunit beta                                                                                      | 7.1     | 0.0000 |                  |
| Fermentation       | Butyrate_production_CD1054-1059        | CD630_10560 | etfA  | Electron transfer flavoprotein subunit alpha                                                                                      | 8.33    | 0.0000 |                  |
| Fermentation       | Butyrate_production_CD1054-1059        | CD630_10570 | crt2  | 3-hydroxybutyryl-CoA dehydratase (Crotonase)                                                                                      | 5.92    | 0.0001 |                  |
| Fermentation       | Butyrate_production_CD1054-1059        | CD630_10580 | hbd   | 3-hydroxybutyryl-CoA dehydrogenase                                                                                                | 7.01    | 0.0000 |                  |
| Fermentation       | Butyrate_production_CD1054-1059        | CD630_10590 | thiA1 | Acetoacetyl-CoA thiolase 1                                                                                                        | 9.26    | 0.0000 |                  |
| Membrane Transport | Symporter_Sodium-dicarboxylate_CD2541  | CD630_25410 |       | Sodium:glutamate/aspartate symporter family                                                                                       | 2.11    | 0.0013 |                  |
| Membrane Transport | ABC_Cobalt_CD0324-0327                 | CD630_03240 | cbiM  | Cobalamin biosynthesis protein                                                                                                    | 8.04    | 0.0000 |                  |
| Membrane Transport | ABC_Cobalt_CD0324-0327                 | CD630_03250 | cbiN  | ABC-type transport system, cobalt-specific extracellular solute-binding protein                                                   | 12.07   | 0.0000 |                  |
| Membrane Transport | ABC_Cobalt_CD0324-0327                 | CD630_03260 | cbiQ  | ABC-type transport system, cobalt-specific permease                                                                               | 9.47    | 0.0000 |                  |
| Membrane Transport | ABC_Cobalt_CD0324-0327                 | CD630_03270 | cbiO  | ABC-type transport system, cobalt-specific ATP-binding protein                                                                    | 9.86    | 0.0000 |                  |
| Membrane Transport | ABC_Amino-Acid_CD2172-2177             | CD630_21720 |       | ABC-type transport system, cystine/aminoacid-family ATP-binding protein                                                           | 0.34    | 0.0002 |                  |
| Membrane Transport | ABC_Amino-Acid_CD2172-2177             | CD630_21730 |       | Putative peptidase, M20D family                                                                                                   | 0.35    | 0.0026 |                  |
| Membrane Transport | ABC_Amino-Acid_CD2172-2177             | CD630_21740 |       | ABC-type transport system, cystine/aminoacid-family extracellular solute-binding protein                                          | 0.24    | 0.0000 |                  |
| Membrane Transport | ABC_Amino-Acid_CD2172-2177             | CD630_21750 |       | ABC-type transport system, cystine/aminoacid-family permease                                                                      | 0.27    | 0.0008 |                  |
| Membrane Transport | ABC_Amino-Acid_CD2172-2177             | CD630_21760 |       | ABC-type transport system, cystine/aminoacid-family permease                                                                      | 0.3     | 0.0003 |                  |
| Membrane Transport | ABC_Amino-Acid_CD2172-2177             | CD630_21770 |       | ABC-type transport system, cystine/aminoacid-family extracellular solute-binding protein                                          | 0.24    | 0.0000 |                  |
| Membrane Transport | ABC_CD0873-CD0875                      | CD630_08730 |       | ABC-type transport system, sugar-family extracellular solute-binding protein                                                      | 0.29    | 0.0001 |                  |
| Membrane Transport | ABC_CD0873-CD0875                      | CD630_08740 |       | ABC-type transport system, sugar-family ATP-binding protein                                                                       | 0.37    | 0.0001 |                  |
| Membrane Transport | PTS_Beta-glucoside_CD3115-3117         | CD630_31150 | bgIA  | 6-phospho-beta-glucosidase                                                                                                        | 0.23    | 0.0002 |                  |
| Membrane Transport | PTS_Beta-glucoside_CD3115-3117         | CD630_31160 | bgIF  | PTS system, beta-glucoside-specific IIABC component                                                                               | 0.26    | 0.0024 |                  |
| Membrane Transport | PTS_Beta-glucoside_CD3115-3117         | CD630_31170 | bgIG  | Transcription antiterminator, PTS operon regulator                                                                                | 0.2     | 0.0009 |                  |
| Membrane Transport | PTS_Mannose_CD2566-2569                | CD630_25660 |       | PTS system, mannose-specific IIA component                                                                                        | 0.45    | 0.0015 |                  |
| Membrane Transport | PTS_Mannose_CD2566-2569                | CD630_25670 |       | PTS system, mannose-specific IIB component                                                                                        | 0.28    | 0.0000 |                  |
| Membrane Transport | PTS_Mannose_CD2566-2569                | CD630_25680 |       | PTS system, mannose-specific IIC component                                                                                        | 0.32    | 0.0000 |                  |
| Membrane Transport | PTS_Mannose_CD2566-2569                | CD630_25690 |       | Putative glycoside hydrolase, family 38 Putative alpha-mannosidase                                                                | 0.55    | 0.0023 |                  |
| Membrane Transport | Carbohydrate_transport_CD3017          | CD630_30170 |       | Putative glucose uptake protein                                                                                                   | 0.31    | 0.0004 |                  |
| Membrane Transport | PTS_Beta-glucoside_CD3136-3138         | CD630_31360 | bgIA  | 6-phospho-beta-glucosidase                                                                                                        | 0.11    | 0.0005 |                  |
| Membrane Transport | PTS_Beta-glucoside_CD3136-3138         | CD630_31370 | bgIF  | PTS system, beta-glucoside-specific IIABC component                                                                               | 0.12    | 0.0002 |                  |
| Membrane Transport | PTS_Beta-glucoside_CD3136-3138         | CD630_31380 | bgIG  | Transcription antiterminator, PTS operon regulator                                                                                | 0.29    | 0.0002 |                  |
| Membrane Transport | ABC_Oligopeptide_CD2670-2674           | CD630_26700 |       | ABC-type transport system, ATP-binding protein putative oligopeptide transport system                                             | 0.26    | 0.0001 |                  |
| Membrane Transport | ABC_Oligopeptide_CD2670-2674           | CD630_26710 |       | ABC-type transport system, ATP-binding protein putative oligopeptide transport system                                             | 0.25    | 0.0000 |                  |
| Membrane Transport | ABC_Oligopeptide_CD2670-2674           | CD630_26720 | appA  | ABC-type transport system, oligopeptide-family solute-binding protein                                                             | 0.21    | 0.0000 |                  |
| Membrane Transport | ABC_Oligopeptide_CD2670-2674           | CD630_26730 | appB  | ABC-type transport system, oligopeptide-family permease protein                                                                   | 0.29    | 0.0000 |                  |
| Membrane Transport | ABC_Oligopeptide_CD2670-2674           | CD630_26740 | appC  | ABC-type transport system, oligopeptide-family permease protein                                                                   | 0.33    | 0.0002 |                  |
| Membrane Transport | ATP_synthase_CD2954-2961               | CD630_29540 | atpD  | V-type ATP synthase subunit D                                                                                                     | 3.07    | 0.0003 |                  |
| Membrane Transport | ATP_synthase_CD2954-2961               | CD630_29550 | atpB  | V-type ATP synthase beta chain (V-type ATPase subunit B)                                                                          | 3.62    | 0.0000 |                  |
| Membrane Transport | ATP_synthase_CD2954-2961               | CD630_29560 | atpA  | V-type ATP synthase alpha chain (V-type ATPase subunit A)                                                                         | 3.43    | 0.0001 |                  |
| Membrane Transport | ATP_synthase_CD2954-2961               | CD630_29561 | atpF  | V-type ATP synthase subunit F                                                                                                     | 3.19    | 0.0002 |                  |
| Membrane Transport | ATP_synthase_CD2954-2961               | CD630_29570 | atpC  | V-type ATP synthase subunit C                                                                                                     | 2.9     | 0.0007 |                  |
| Membrane Transport | ATP_synthase_CD2954-2961               | CD630_29580 | atpE  | V-type ATP synthase subunit E (V-type ATPase subunit E)                                                                           | 3.49    | 0.0000 |                  |
| Membrane Transport | ATP_synthase_CD2954-2961               | CD630_29590 | atpK  | V-type ATP synthase subunit K                                                                                                     | 3.12    | 0.0002 |                  |
| Membrane Transport | ATP_synthase_CD2954-2961               | CD630_29600 | atpI  | V-type sodium ATP synthase subunit I                                                                                              | 3.15    | 0.0007 |                  |

|                       |                                        |             |                                                                                                                                             |         |       |        |     |
|-----------------------|----------------------------------------|-------------|---------------------------------------------------------------------------------------------------------------------------------------------|---------|-------|--------|-----|
| Membrane Transport    | ATP_synthase_CD2954-2961               | CD630_29610 | Conserved hypothetical protein                                                                                                              |         | 3.02  | 0.0002 |     |
| Membrane Transport    | ABC_Iron_CD2997-CD2999                 | CD630_29970 | ABC-type transport system, iron-family ATP-binding protein                                                                                  |         | 2.1   | 0.0012 |     |
| Membrane Transport    | ABC_Iron_CD2997-CD2999                 | CD630_29980 | ABC-type transport system, iron-family permease                                                                                             |         | 2.26  | 0.0010 |     |
| Membrane Transport    | ABC_Iron_CD2997-CD2999                 | CD630_29990 | ABC-type transport system, iron-family extracellular solute-binding protein                                                                 |         | 2.43  | 0.0008 |     |
| Membrane Transport    | PTS_Glucose_CD2666-2667                | CD630_26660 | ptsG-A PTS system, glucose-specific IIA component                                                                                           | ptsG-A  | 0.04  | 0.0000 |     |
| Membrane Transport    | PTS_Glucose_CD2666-2667                | CD630_26670 | ptsG-BC PTS system, glucose-specific IIB component                                                                                          | ptsG-BC | 0.04  | 0.0001 |     |
| Membrane Transport    | PTS_Sorbitol_CD0762-0768               | CD630_07620 | srlR PTS operon regulator                                                                                                                   | srlR    | 0.4   | 0.0012 |     |
| Membrane Transport    | PTS_Sorbitol_CD0762-0768               | CD630_07630 | srlM Sorbitol operon activator protein (Glucitol)                                                                                           | srlM    | 0.29  | 0.0001 |     |
| Membrane Transport    | PTS_Sorbitol_CD0762-0768               | CD630_07640 | srlA PTS system, sorbitol-specific IIC component (Glucitol)                                                                                 | srlA    | 0.35  | 0.0105 |     |
| Membrane Transport    | PTS_Sorbitol_CD0762-0768               | CD630_07650 | srlEa PTS system, sorbitol-specific IIB N-terminal component (Glucitol)                                                                     | srlEa   | 0.22  | 0.0001 |     |
| Membrane Transport    | PTS_Sorbitol_CD0762-0768               | CD630_07660 | srlEb PTS system, sorbitol-specific IIB C-terminal component (Glucitol)                                                                     | srlEb   | 0.28  | 0.0024 |     |
| Membrane Transport    | PTS_Sorbitol_CD0762-0768               | CD630_07670 | srlB PTS system, sorbitol-specific IIA component (Glucitol)                                                                                 | srlB    | 0.26  | 0.0007 |     |
| Membrane Transport    | PTS_Sorbitol_CD0762-0768               | CD630_07680 | srlD Sorbitol 6-phosphate 2-dehydrogenase (Glucitol)                                                                                        | srlD    | 0.21  | 0.0008 |     |
| Membrane Transport    | Transporter_CD3019                     | CD630_30190 | Putative transporter                                                                                                                        |         | 0.37  | 0.0011 |     |
| Metabolism Amino Acid | Proline_utilization_CD3236-3244        | CD630_32360 | Putative membrane protein                                                                                                                   |         | 0.05  | 0.0001 |     |
| Metabolism Amino Acid | Proline_utilization_CD3236-3244        | CD630_32370 | PrdF Proline racemase                                                                                                                       | prdF    | 0.03  | 0.0000 |     |
| Metabolism Amino Acid | Proline_utilization_CD3236-3244        | CD630_32380 | Putative component of proline reductase prdE-like                                                                                           |         | 0.03  | 0.0000 |     |
| Metabolism Amino Acid | Proline_utilization_CD3236-3244        | CD630_32390 | prdE Proline reductase PrdE                                                                                                                 | prdE    | 0.03  | 0.0000 |     |
| Metabolism Amino Acid | Proline_utilization_CD3236-3244        | CD630_32400 | prdD Proline reductase PrdD                                                                                                                 | prdD    | 0.04  | 0.0000 |     |
| Metabolism Amino Acid | Proline_utilization_CD3236-3244        | CD630_32410 | prdB Proline reductase (selenocysteine)                                                                                                     | prdB    | 0.04  | 0.0000 |     |
| Metabolism Amino Acid | Proline_utilization_CD3236-3244        | CD630_32430 | Conserved hypothetical protein                                                                                                              |         | 0.03  | 0.0000 |     |
| Metabolism Amino Acid | Proline_utilization_CD3236-3244        | CD630_32440 | prdA D-proline reductase proprotein prdA                                                                                                    | prdA    | 0.04  | 0.0000 |     |
| Metabolism Amino Acid | Glycine_utilization_CD2348-2358        | CD630_23480 | grdD Glycine reductase complex component C subunit alpha (Protein PC alpha)                                                                 | grdD    | 24.69 | 0.0000 |     |
| Metabolism Amino Acid | Glycine_utilization_CD2348-2358        | CD630_23490 | grdC Glycine reductase complex component C subunit beta (Protein PC beta)                                                                   | grdC    | 28.37 | 0.0000 |     |
| Metabolism Amino Acid | Glycine_utilization_CD2348-2358        | CD630_23510 | grdB Glycine reductase complex component B gamma subunit (selenocysteine)                                                                   | grdB    | 64.16 | 0.0000 |     |
| Metabolism Amino Acid | Glycine_utilization_CD2348-2358        | CD630_23520 | grdA Glycine reductase complex selenoprotein A (selenocysteine)                                                                             | grdA    | 51.54 | 0.0000 |     |
| Metabolism Amino Acid | Glycine_utilization_CD2348-2358        | CD630_23540 | grdE Glycine reductase complex component B subunits alpha and beta (Selenoprotein PB alpha/beta) [Contains: Betaine reductase component B : | grdE    | 46.46 | 0.0000 | Yes |
| Metabolism Amino Acid | Glycine_utilization_CD2348-2358        | CD630_23550 | trxA2 Thioredoxin 2 (Trx2)                                                                                                                  | trxA2   | 22.66 | 0.0000 |     |
| Metabolism Amino Acid | Glycine_utilization_CD2348-2358        | CD630_23560 | trxB3 Thioredoxin reductase 3                                                                                                               | trxB3   | 21.48 | 0.0000 |     |
| Metabolism Amino Acid | Glycine_utilization_CD2348-2358        | CD630_23570 | grdX Putative glycine reductase complex component                                                                                           | grdX    | 6.61  | 0.0000 |     |
| Metabolism Amino Acid | Glycine_utilization_CD2348-2358        | CD630_23580 | Oligoendopeptidase-related, clade2, M3B family                                                                                              |         | 3.21  | 0.0005 |     |
| Metabolism Amino Acid | Aminotransferase_CD3664                | CD630_36640 | Putative aminotransferase                                                                                                                   |         | 0.38  | 0.0002 |     |
| Metabolism Amino Acid | Amidohydrolase_CD3099-CD3100           | CD630_30990 | Putative amidohydrolase, M20D family                                                                                                        |         | 3.96  | 0.0000 |     |
| Metabolism Amino Acid | Amidohydrolase_CD3099-CD3100           | CD630_31000 | Putative C4-dicarboxylate anaerobic carrier, DcuC family                                                                                    |         | 4.23  | 0.0001 |     |
| Metabolism Carbon     | Hydrolase_transaminase_CD2849          | CD630_28490 | phnXW Bifunctional phosphonoacetaldehyde hydrolase/aminoethylphosphonate transaminase [Includes: Phosphonoacetaldehyde hydrolase 2-ami      | phnXW   | 0.46  | 0.0021 |     |
| Metabolism Carbon     | Glycolysis_CD3171-3174                 | CD630_31710 | gpmI 2,3-bisphosphoglycerate-independent phosphoglycerate mutase (Phosphoglyceromutase) (BPG-independent PGAM) (iPGM)                       | gpmI    | 2.08  | 0.0011 |     |
| Metabolism Carbon     | Glycolysis_CD3171-3174                 | CD630_31720 | tpi Triosephosphate isomerase (TIM) (Triose-phosphate isomerase)                                                                            | tpi     | 2.16  | 0.0016 |     |
| Metabolism Carbon     | Glycolysis_CD3171-3174                 | CD630_31730 | pgk Phosphoglycerate kinase                                                                                                                 | pgk     | 2.51  | 0.0014 |     |
| Metabolism Carbon     | Glycolysis_CD3171-3174                 | CD630_31740 | gapA Glyceraldehyde-3-phosphate dehydrogenase (GAPDH)                                                                                       | gapA    | 4.78  | 0.0000 |     |
| Metabolism Carbon     | Nitrogen_degradation_CD1384-CD1387     | CD630_13840 | Putative lamB-like protein, UPF0271 family                                                                                                  |         | 2.5   | 0.0005 |     |
| Metabolism Carbon     | Nitrogen_degradation_CD1384-CD1387     | CD630_13850 | Putative natural resistance-associated macrophage protein                                                                                   |         | 2.86  | 0.0003 |     |
| Metabolism Carbon     | Nitrogen_degradation_CD1384-CD1387     | CD630_13860 | Putative allophanate hydrolase subunit 1                                                                                                    |         | 2.44  | 0.0005 |     |
| Metabolism Carbon     | Nitrogen_degradation_CD1384-CD1387     | CD630_13870 | Putative allophanate hydrolase subunit 2                                                                                                    |         | 2.62  | 0.0001 |     |
| Metabolism Carbon     | Dehydrogenase_GA3P_CD1767              | CD630_17670 | gapB Glyceraldehyde-3-phosphate dehydrogenase (GAPDH)                                                                                       | gapB    | 0.07  | 0.0000 |     |
| Metabolism Carbon     | Glycolysis_CD3394-3395                 | CD630_33940 | pyk Pyruvate kinase (PK)                                                                                                                    | pyk     | 3.38  | 0.0010 |     |
| Metabolism Carbon     | Glycolysis_CD3394-3395                 | CD630_33950 | pfkA 6-phosphofructokinase (Phosphofructokinase) (Phosphohexokinase)                                                                        | pfkA    | 2.43  | 0.0009 |     |
| Metabolism Carbon     | Enolase_CD3170                         | CD630_31700 | eno Enolase (2-phosphoglycerate dehydratase) (2-phospho-D-glycerate hydro-lyase)                                                            | eno     | 2.2   | 0.0007 |     |
| Metabolism Carbon     | Gluconeogenesis_regulators_CD2410-2412 | CD630_24100 | ppdK Pyruvate phosphate dikinase (ATP-pyruvate, phosphate phosphotransferase)                                                               | ppdK    | 0.23  | 0.0003 |     |
| Metabolism Carbon     | Gluconeogenesis_regulators_CD2410-2412 | CD630_24110 | Putative positive regulator of gluconeogenesis putative phosphotransferase                                                                  |         | 0.48  | 0.0014 |     |
| Metabolism Carbon     | Gluconeogenesis_regulators_CD2410-2412 | CD630_24120 | Putative negative regulator of gluconeogenesis                                                                                              |         | 0.4   | 0.0005 |     |
| Metabolism Carbon     | Carbohydrate_hydrolase_CD3001-CD3004   | CD630_30010 | Putative hydrolase/isomerase/hydrtase                                                                                                       |         | 0.28  | 0.0000 |     |
| Metabolism Carbon     | Carbohydrate_hydrolase_CD3001-CD3004   | CD630_30020 | uxaA D-galactate dehydratase/Altronate hydrolase                                                                                            | uxaA    | 0.2   | 0.0000 |     |
| Metabolism Carbon     | Carbohydrate_hydrolase_CD3001-CD3004   | CD630_30030 | Putative N-terminus region of carbohydrate hydrolase, SAF domain                                                                            |         | 0.23  | 0.0001 |     |
| Metabolism Carbon     | Carbohydrate_hydrolase_CD3001-CD3004   | CD630_30040 | kdgT2 2-keto-3-deoxygluconate permease 2                                                                                                    | kdgT2   | 0.23  | 0.0001 |     |
| Metabolism Carbon     | Polysaccharide_deacetylase_CD3248      | CD630_32480 | Polysaccharide deacetylase                                                                                                                  |         | 0.17  | 0.0004 |     |
| Metabolism Cofactor   | Fe-S_binding-protein_CD2168-2169       | CD630_21680 | hcp Hydroxylamine reductase                                                                                                                 | hcp     | 2.81  | 0.0002 |     |
| Metabolism Cofactor   | Fe-S_binding-protein_CD2168-2169       | CD630_21690 | Putative iron-sulfur binding protein                                                                                                        |         | 2.56  | 0.0004 |     |
| Metabolism Cofactor   | CoA_reductase_CD2540                   | CD630_25400 | Coenzyme A disulfide reductase                                                                                                              |         | 2.8   | 0.0002 |     |
| Metabolism Lipids     | Ethanolamine_utilization_CD1906-1925   | CD630_19060 | Conserved hypothetical protein                                                                                                              |         | 0.97  | 0.9700 |     |
| Metabolism Lipids     | Ethanolamine_utilization_CD1906-1925   | CD630_19070 | eutG Ethanolamine iron-dependent Alcohol dehydrogenase                                                                                      | eutG    | 8.22  | 0.0002 |     |
| Metabolism Lipids     | Ethanolamine_utilization_CD1906-1925   | CD630_19080 | eutS Ethanolamine carboxysome structural protein, BMC family                                                                                | eutS    | 8.78  | 0.0001 |     |
| Metabolism Lipids     | Ethanolamine_utilization_CD1906-1925   | CD630_19090 | eutP Ethanolamine utilization protein, GTPase family                                                                                        | eutP    | 9.02  | 0.0000 |     |
| Metabolism Lipids     | Ethanolamine_utilization_CD1906-1925   | CD630_19100 | eutV Two-component response regulator, Ethanolamine specific                                                                                | eutV    | 6.83  | 0.0001 |     |
| Metabolism Lipids     | Ethanolamine_utilization_CD1906-1925   | CD630_19110 | eutW Two-component sensor histidine kinase, Ethanolamine specific                                                                           | eutW    | 5.55  | 0.0002 |     |
| Metabolism Lipids     | Ethanolamine_utilization_CD1906-1925   | CD630_19120 | eutA Ethanolamine reactivating factor for ammonia lyase eutBC                                                                               | eutA    | 32.97 | 0.0001 |     |
| Metabolism Lipids     | Ethanolamine_utilization_CD1906-1925   | CD630_19130 | eutB Ethanolamine ammonia lyase large subunit                                                                                               | eutB    | 71.88 | 0.0000 |     |
| Metabolism Lipids     | Ethanolamine_utilization_CD1906-1925   | CD630_19140 | eutC Ethanolamine ammonia lyase small subunit                                                                                               | eutC    | 19.41 | 0.0000 |     |
| Metabolism Lipids     | Ethanolamine_utilization_CD1906-1925   | CD630_19150 | eutL Ethanolamine carboxysome structural protein, BMC family                                                                                | eutL    | 23.95 | 0.0000 |     |

|                       |                                           |             |       |                                                                                |       |        |
|-----------------------|-------------------------------------------|-------------|-------|--------------------------------------------------------------------------------|-------|--------|
| Metabolism Lipids     | Ethanolamine_utilization_CD1906-1925      | CD630_19160 | eutM  | Ethanolamine carboxysome structural protein, BMC family                        | 39.12 | 0.0000 |
| Metabolism Lipids     | Ethanolamine_utilization_CD1906-1925      | CD630_19170 | eutE  | Ethanolamine acetaldehyde oxydoreductase                                       | 31.16 | 0.0000 |
| Metabolism Lipids     | Ethanolamine_utilization_CD1906-1925      | CD630_19180 | eutK  | Ethanolamine carboxysome structural protein, BMC family                        | 61.95 | 0.0000 |
| Metabolism Lipids     | Ethanolamine_utilization_CD1906-1925      | CD630_19190 | eutT  | Ethanolamine corrinoid cobalamin adenosyltransferase                           | 20.28 | 0.0000 |
| Metabolism Lipids     | Ethanolamine_utilization_CD1906-1925      | CD630_19200 | eutD  | Putative phosphotransacetylase                                                 | 14.37 | 0.0000 |
| Metabolism Lipids     | Ethanolamine_utilization_CD1906-1925      | CD630_19210 |       | Putative ethanolamine utilization protein                                      | 14.41 | 0.0003 |
| Metabolism Lipids     | Ethanolamine_utilization_CD1906-1925      | CD630_19220 | eutN  | Ethanolamine carboxysome structural protein, BMC family                        | 18.6  | 0.0000 |
| Metabolism Lipids     | Ethanolamine_utilization_CD1906-1925      | CD630_19230 |       | Ethanolamine carboxysome structural protein, BMC family                        | 12.41 | 0.0000 |
| Metabolism Lipids     | Ethanolamine_utilization_CD1906-1925      | CD630_19240 | eutH  | Ethanolamine transport protein                                                 | 20.14 | 0.0000 |
| Metabolism Lipids     | Ethanolamine_utilization_CD1906-1925      | CD630_19250 | eutQ  | Ethanolamine utilization protein, Cupin barrels family                         | 13.76 | 0.0001 |
| Regulations           | TR_HxlR_CD3165-CD3166                     | CD630_31650 |       | Conserved hypothetical protein                                                 | 0.35  | 0.0008 |
| Regulations           | TR_HxlR_CD3165-CD3166                     | CD630_31660 |       | Transcriptional regulator, hxlR family                                         | 0.29  | 0.0000 |
| Regulations           | TR_licT_CD2668                            | CD630_26680 |       | Transcription antiterminator, licT family                                      | 0.19  | 0.0001 |
| Regulations           | PEBP_regulatory_protein_CD3167            | CD630_31670 |       | Putative phosphatidylethanolamine-binding regulatory protein                   | 0.48  | 0.0016 |
| Regulations           | Diguanylate_kinase_signaling_protein_CD15 | CD630_15380 |       | Putative signaling protein                                                     | 2.72  | 0.0005 |
| Regulations           | Histidine_kinase_CD1811                   | CD630_18110 |       | Fragment of putative two-component sensor histidine kinase (N-terminal region) | 5.25  | 0.0007 |
| Regulations           | Sig54_modulation-protein_CD2444           | CD630_24440 |       | Putative ribosome-associated sigma 54 modulation protein                       | 0.43  | 0.0004 |
| Regulations           | TR_DeoR_CD2850                            | CD630_28500 |       | Transcriptional regulator, DeoR family                                         | 0.5   | 0.0019 |
| Regulations           | TR_CggR_CD3175                            | CD630_31750 | cggR  | Transcriptional regulator, SorC family                                         | 3.93  | 0.0000 |
| Regulations           | TCS_VirR_CD3255                           | CD630_32550 | rgaR  | Two-component response regulator VirR-like                                     | 0.38  | 0.0012 |
| Respiration Anaerobic | NO_reductase_CD1623                       | CD630_16230 |       | Putative oxidoreductase                                                        | 2.31  | 0.0004 |
| Respiration Anaerobic | Fe-S_oxidoreductase_CD2178-2179           | CD630_21780 |       | Putative oxidoreductase, Fe-S subunit                                          | 0.25  | 0.0000 |
| Respiration Anaerobic | Fe-S_oxidoreductase_CD2178-2179           | CD630_21790 |       | Putative anaerobic dehydrogenase                                               | 0.24  | 0.0001 |
| Respiration Anaerobic | Electron_transport_CD3247                 | CD630_32470 | prdC  | Putative electron transfer protein                                             | 0.03  | 0.0000 |
| Respiration Anaerobic | Electron_transport_CD1137-1142            | CD630_11370 | rnfC  | Electron transport complex protein                                             | 0.34  | 0.0001 |
| Respiration Anaerobic | Electron_transport_CD1137-1142            | CD630_11380 | rnfD  | Electron transport complex protein                                             | 0.3   | 0.0002 |
| Respiration Anaerobic | Electron_transport_CD1137-1142            | CD630_11390 | rnfG  | Electron transport complex protein                                             | 0.39  | 0.0013 |
| Respiration Anaerobic | Electron_transport_CD1137-1142            | CD630_11400 | rnfE  | Electron transport complex protein                                             | 0.32  | 0.0013 |
| Respiration Anaerobic | Electron_transport_CD1137-1142            | CD630_11410 | rnfA  | Electron transport complex protein                                             | 0.33  | 0.0001 |
| Respiration Anaerobic | Electron_transport_CD1137-1142            | CD630_11420 | rnfB  | Electron transport complex protein                                             | 0.34  | 0.0001 |
| Secretion             | Exported-protein_CD0739                   | CD630_07390 |       | Putative exported protein                                                      | 0.29  | 0.0004 |
| Secretion             | Exported-protein_CD0738                   | CD630_07380 |       | Putative exported protein                                                      | 0.31  | 0.0002 |
| Sporulation           | Lysine_synthesis_CD3000                   | CD630_30000 | dapA1 | Dihydrodipicolinate synthase 1                                                 | 0.28  | 0.0002 |
| Stress                | Vancomycin-protein_CD2149                 | CD630_21490 |       | Putative vancomycin resistance protein, vanW family                            | 0.43  | 0.0005 |
| Stress                | Beta-lactamase_CD0895                     | CD630_08950 |       | Metallo-beta-lactamase superfamily exported protein                            | 2.21  | 0.0007 |
| Translation           | tRNA-binding_protein_CD2392               | CD630_23920 |       | Putative tRNA-binding protein                                                  | 0.41  | 0.0005 |
| UNKNOWN               | CHP_CD2251                                | CD630_22510 |       | Conserved hypothetical protein                                                 | 0.43  | 0.0009 |
| UNKNOWN               | CHP_CD2369                                | CD630_23690 |       | Conserved hypothetical protein                                                 | 0.34  | 0.0008 |
| UNKNOWN               | CHP_CD3072                                | CD630_30720 |       | Conserved hypothetical protein                                                 | 0.32  | 0.0014 |
| UNKNOWN               | CHP_CD2368                                | CD630_23680 |       | Conserved hypothetical protein                                                 | 0.43  | 0.0018 |
| UNKNOWN               | CHP_CD3617                                | CD630_36170 |       | Conserved hypothetical protein                                                 | 2.62  | 0.0012 |
| UNKNOWN               | CHP_CD3325                                | CD630_33250 |       | Conserved hypothetical protein                                                 | 2.09  | 0.0016 |
| UNKNOWN               | CHP_CD2752                                | CD630_27520 |       | Conserved hypothetical protein                                                 | 0.15  | 0.0009 |
| UNKNOWN               | CHP_CD0281                                | CD630_02810 |       | Conserved hypothetical protein                                                 | 2.88  | 0.0007 |
| Virulence Factors     | P-cresol_production_CD0153-CD0155         | CD630_01530 | hpdB  | 4-hydroxyphenylacetate decarboxylase, catalytic subunit                        | 0.33  | 0.0003 |
| Virulence Factors     | P-cresol_production_CD0153-CD0155         | CD630_01540 | hpdC  | 4-hydroxyphenylacetate decarboxylase, regulatory subunit                       | 0.35  | 0.0003 |
| Virulence Factors     | P-cresol_production_CD0153-CD0155         | CD630_01550 | hpdA  | 4-hydroxyphenylacetate decarboxylase, activating subunit                       | 0.35  | 0.0169 |

**Supplementary Table S3. Genes regulated  $\geq 2$ -fold by the presence of proline and by inactivation of PrdR.**

| Gene ID     | Name  | Product                                                                                                                                                             | TYP/TY | prdR/WT |
|-------------|-------|---------------------------------------------------------------------------------------------------------------------------------------------------------------------|--------|---------|
| CD630_03240 | cblM  | Cobalamin biosynthesis protein                                                                                                                                      | 0.27   | 8.04    |
| CD630_03250 | cblN  | ABC-type transport system, cobalt-specific extracellular solute-binding protein                                                                                     | 0.25   | 12.07   |
| CD630_03260 | cblQ  | ABC-type transport system, cobalt-specific permease                                                                                                                 | 0.29   | 9.47    |
| CD630_03270 | cblO  | ABC-type transport system, cobalt-specific ATP-binding protein                                                                                                      | 0.28   | 9.86    |
| CD630_07380 |       | Putative exported protein                                                                                                                                           | 2.12   | 0.31    |
| CD630_08070 |       | Conserved hypothetical protein                                                                                                                                      | 0.37   | 0.29    |
| CD630_08300 |       | Putative membrane protein                                                                                                                                           | 0.17   | 3.72    |
| CD630_08730 |       | ABC-type transport system, sugar-family extracellular solute-binding protein                                                                                        | 2.05   | 0.29    |
| CD630_08740 |       | ABC-type transport system, sugar-family ATP-binding protein                                                                                                         | 2.34   | 0.37    |
| CD630_08940 |       | Putative iron-dependent hydrogenase                                                                                                                                 | 0.66   | 2.02    |
| CD630_08950 |       | Metallo-beta-lactamase superfamily exported protein                                                                                                                 | 0.46   | 2.21    |
| CD630_10540 | bcd2  | Butyryl-CoA dehydrogenase                                                                                                                                           | 0.04   | 6.68    |
| CD630_10550 | etfB  | Electron transfer flavoproteins subunit beta                                                                                                                        | 0.03   | 7.1     |
| CD630_10560 | etfA  | Electron transfer flavoprotein subunit alpha                                                                                                                        | 0.04   | 8.33    |
| CD630_10570 | crt2  | 3-hydroxybutyryl-CoA dehydratase (Crotonase)                                                                                                                        | 0.05   | 5.92    |
| CD630_10580 | hbd   | 3-hydroxybutyryl-CoA dehydrogenase                                                                                                                                  | 0.03   | 7.01    |
| CD630_10590 | thlA1 | Acetoacetyl-CoA thiolase 1                                                                                                                                          | 0.03   | 9.26    |
| CD630_13840 |       | Putative lamB-like protein, UPF0271 family                                                                                                                          | 0.32   | 2.5     |
| CD630_13850 |       | Putative natural resistance-associated macrophage protein                                                                                                           | 0.27   | 2.86    |
| CD630_13860 |       | Putative allophanate hydrolase subunit 1                                                                                                                            | 0.38   | 2.44    |
| CD630_13870 |       | Putative allophanate hydrolase subunit 2                                                                                                                            | 0.29   | 2.62    |
| CD630_15380 |       | Putative signaling protein                                                                                                                                          | 0.49   | 2.72    |
| CD630_16230 |       | Putative oxidoreductase                                                                                                                                             | 0.29   | 2.31    |
| CD630_21780 |       | Putative oxidoreductase, Fe-S subunit                                                                                                                               | 2.34   | 0.25    |
| CD630_21790 |       | Putative anaerobic dehydrogenase                                                                                                                                    | 2.28   | 0.24    |
| CD630_23380 | 4hbD  | 4-hydroxybutyrate dehydrogenase (4-hydroxybutanoate:NAD <sup>+</sup> oxidoreductase)                                                                                | 0.17   | 3.33    |
| CD630_23390 | cat2  | 4-hydroxybutyrate CoA transferase                                                                                                                                   | 0.15   | 2.99    |
| CD630_23400 |       | Conserved hypothetical protein                                                                                                                                      | 0.15   | 3.105   |
| CD630_23410 | abfD  | Gamma-aminobutyrate metabolism dehydratase/isomerase [includes: 4- hydroxybutyryl-coa dehydratase vinylacetyl-coa-delta-isomerase]                                  | 0.13   | 4.12    |
| CD630_23420 | sucD  | Succinate-semialdehyde dehydrogenase (NAD(P) <sup>+</sup> )                                                                                                         | 0.05   | 10.44   |
| CD630_23430 | cat1  | Succinyl-CoA:coenzyme A transferase                                                                                                                                 | 0.04   | 10.4    |
| CD630_23440 |       | Putative membrane protein                                                                                                                                           | 0.1    | 4.52    |
| CD630_23480 | grdD  | Glycine reductase complex component C subunit alpha (Protein PC alpha)                                                                                              | 0.05   | 24.69   |
| CD630_23490 | grdC  | Glycine reductase complex component C subunit beta (Protein PC beta)                                                                                                | 0.05   | 28.37   |
| CD630_23510 | grdB  | Glycine reductase complex component B gamma subunit (selenocysteine)                                                                                                | 0.04   | 64.16   |
| CD630_23520 | grdA  | Glycine reductase complex selenoprotein A (selenocysteine)                                                                                                          | 0.04   | 51.54   |
| CD630_23540 | grdE  | Glycine reductase complex component B subunits alpha and beta (Selenoprotein PB alpha/beta) [Contains: Betaine reductase component B subunit beta Betaine reductase | 0.06   | 46.46   |
| CD630_23550 | trxA2 | Thioredoxin 2 (Trx2)                                                                                                                                                | 0.05   | 22.66   |
| CD630_23560 | trxB3 | Thioredoxin reductase 3                                                                                                                                             | 0.05   | 21.48   |
| CD630_23570 | grdX  | Putative glycine reductase complex component                                                                                                                        | 0.1    | 6.61    |
| CD630_23580 |       | Oligoendopeptidase-related, clade2, M3B family                                                                                                                      | 0.49   | 3.21    |
| CD630_25410 |       | Sodium:glutamate/aspartate symporter family                                                                                                                         | 0.37   | 2.11    |
| CD630_29540 | atpD  | V-type ATP synthase subunit D                                                                                                                                       | 0.19   | 3.07    |

|             |       |                                                                  |       |       |
|-------------|-------|------------------------------------------------------------------|-------|-------|
| CD630_29550 | atpB  | V-type ATP synthase beta chain (V-type ATPase subunit B)         | 0.15  | 3.62  |
| CD630_29560 | atpA  | V-type ATP synthase alpha chain (V-type ATPase subunit A)        | 0.13  | 3.43  |
| CD630_29561 | atpF  | V-type ATP synthase subunit F                                    | 0.14  | 3.19  |
| CD630_29570 | atpC  | V-type ATP synthase subunit C                                    | 0.15  | 2.9   |
| CD630_29580 | atpE  | V-type ATP synthase subunit E (V-type ATPase subunit E)          | 0.14  | 3.49  |
| CD630_29590 | atpK  | V-type ATP synthase subunit K                                    | 0.13  | 3.12  |
| CD630_29600 | atpI  | V-type sodium ATP synthase subunit I                             | 0.16  | 3.15  |
| CD630_29610 |       | Conserved hypothetical protein                                   | 0.16  | 3.02  |
| CD630_29660 | adhE  | Aldehyde-alcohol dehydrogenase                                   | 0.05  | 12.77 |
| CD630_30000 | dapA1 | Dihydrodipicolinate synthase 1                                   | 2.83  | 0.28  |
| CD630_30010 |       | Putative hydrolase/isomerase/hydratase                           | 3.39  | 0.28  |
| CD630_30020 | uxaA  | D-galactate dehydratase/Altronate hydrolase                      | 4.12  | 0.2   |
| CD630_30030 |       | Putative N-terminus region of carbohydrate hydrolase, SAF domain | 6.1   | 0.23  |
| CD630_30040 | kdgT2 | 2-keto-3-deoxygluconate permease 2                               | 6.36  | 0.23  |
| CD630_30060 |       | Alcohol dehydrogenase                                            | 3.43  | 0.22  |
| CD630_30170 |       | Putative glucose uptake protein                                  | 1.96  | 0.31  |
| CD630_32360 |       | Putative membrane protein                                        | 64.29 | 0.05  |
| CD630_32370 | prdF  | Proline racemase                                                 | 54.08 | 0.03  |
| CD630_32380 |       | Putative component of proline reductase prdE-like                | 41.76 | 0.03  |
| CD630_32390 | prdE  | Proline reductase PrdE                                           | 30.31 | 0.03  |
| CD630_32400 | prdD  | Proline reductase PrdD                                           | 34.1  | 0.04  |
| CD630_32410 | prdB  | Proline reductase (selenocysteine)                               | 45.54 | 0.04  |
| CD630_32430 |       | Conserved hypothetical protein                                   | 61.03 | 0.03  |
| CD630_32440 | prdA  | D-proline reductase proprotein prdA                              | 51.7  | 0.04  |
| CD630_32470 | prdC  | Putative electron transfer protein                               | 36.1  | 0.03  |
| CD630_32480 |       | Polysaccharide deacetylase                                       | 7     | 0.17  |
| CD630_33250 |       | Conserved hypothetical protein                                   | 0.51  | 2.09  |



**Table S4. Spore formation by JIR8094 and *prdR* and *rex* mutants**

| Strain                 | CFU/ml on BHIS (no heat) | CFU/ml on BHIS+TA (no heat) | CFU/ml on BHIS+TA (+heat) |
|------------------------|--------------------------|-----------------------------|---------------------------|
| JIR8094                | $6.5 \times 10^7$        | $6.6 \times 10^7$           | $7.9 \times 10^6$         |
| LB-CD8 ( <i>prdR</i> ) | $3.3 \times 10^7$        | $4.2 \times 10^7$           | $4.8 \times 10^6$         |
| LB-CD24 ( <i>rex</i> ) | $6.3 \times 10^7$        | $7.4 \times 10^7$           | $6.1 \times 10^6$         |

The three strains were streaked on plates of 70:30 medium (1). After 24 hrs, samples of the plate cultures were resuspended in 1-ml liquid 70:30 medium. A portion of the resuspension was heated at 65°C for 20 min, cooled, diluted in 70:30 medium and plated on BHIS plates (2) supplemented with the germination activator sodium taurocholate (TA). The unheated samples were diluted and plated on BHIS with and without TA.

References:

(1) Shen A, Fimlaid KA, Pishdadian K. Inducing and quantifying *Clostridium difficile* spore formation. *Methods Mol Biol.* 2016;1476:129-42.

(2) Bouillaut L, McBride SM, Sorg JA. Genetic manipulation of *Clostridium difficile*. *Curr Protoc Microbiol.* 2011;Chapter 9:Unit 9A 2.

1 **Supplementary Table S5. Oligonucleotide primers used in this study (5' to 3')**

| <b>Name</b> | <b>Sequence</b>                                                  |
|-------------|------------------------------------------------------------------|
| 78          | AAACGCGTTTAACTATTTATCAATTCCTGCAAT                                |
| 83          | AAACGCGTAATTAGATGCTAAAAATTTGTAATT                                |
| EBSu        | CGAAATTAGAACTTGC GTTCAGTAAAC                                     |
| oKZ69       | CCGCTCTAGAGGATCCTGCAGAATTC TTTTTTTTTTTTTTTTTTTTTT<br>TTTT        |
| oKZ70       | CCGCTCTAGAGGATCCTGCAGAATTC                                       |
| oLB131      | GTATGGATAGGTGGAGAAGTCA                                           |
| oLB132      | CTCTTCCTCTAGTAGCTGTAATGC                                         |
| oLB170      | GGTCAAGTACTAGGAGCTAAGT                                           |
| oLB171      | CTACTTCTTCTTTAGCCTCTCCTG                                         |
| oLB176      | CCCTGGTATCATGTCTAAAGTTG                                          |
| oLB177      | GAGTATACTTAGCTCCTTCTCCAG                                         |
| oLB184      | TCAATTCCTCAACAGGTAACCC                                           |
| oLB185      | CTAAGGATGATGCTACAGTTCC                                           |
| oLB186      | CCCTAATTCAAGACGCATAC                                             |
| oLB196      | TGGCGCTATAATTGTTCCCGC                                            |
| oLB198      | GAGAAAATGTTTACAAATACAAAAATAAC                                    |
| oLB240      | CCCTCTAGAGTCTTGTTTTTAACTAAATTG                                   |
| oLB273      | TAAAGGTAGAGGTTATGTTTCTGCT                                        |
| oLB274      | TTTGACCAACTCTTGTGTTTTCC                                          |
| oLB281      | AAGAATATGGTGGAGAAG                                               |
| oLB282      | GAGCCAAGAGATGTATG                                                |
| oLB292      | AAGCATGCTCTGTATACAATCTATAC                                       |
| oLB293      | CATATGAGCCTCCTCAGTATTTTAT                                        |
| oLB329      | AAAGCTTTTGCAACCCACGTCGATCGTGAATTATTTCCCAACGTG<br>CGCCCAGATAGGGTG |
| oLB330      | CAGATTGTACAAATGTGGTGATAACAGATAAGTCCCCAACATTAA<br>CTTACCTTTCTTTGT |
| oLB331      | CGCAAGTTTCTAATTTTCGGTTAATAATCGATAGAGGAAAGTGTCT                   |

oLB332 TTGATATAATATAATCAAGG  
oLB333 CCTAATATTTCAAAAAGCC  
oLB334 AACATATGTTGGGAAATAAAAATATATCAATGG  
oLB335 AAGGATCCTACTTTCCTTCTTTCATTAAATACG  
oLB337 AAGCTATAGCAAGCCATCC  
oLB338 AACTTCATTTTCAGCGAAGC  
oLB339 CAAACTTCTCTGCCTTGAAC  
oLB341 GAGAAAGACGAAGCATTGTTATG  
oLB342 AGCAGTAGAAGTTGGATTAGTTGTA  
oLB345 AAGGATCCATTTCTACCTCCTTGA ACTATC  
oLB369 TTATAACCTTAATCAA ACTACGC  
oLB400 AATAGCATAAGTTTTGTATATTGTTG  
oLB401 CAAACATAAGGACAAAAGGATTC  
oLB402 GTGATATCTAGTTAAATTAAGTATTTG  
oLB403 CCAACTGACATAACTTCATTTTC  
oLB404 TTATCTGTAACCAGTGTGAAAGAAATC  
JP700 GTTTTGATATAATATAATCAAGGTTATATG  
JP701 CCTAATATTTCAAAAAGCCAG  
RamF ACGCGTTATATTGATAAAAATAATAAGTGGG  
RamR ACGCGTGCGACTCATAGAATTATTCCTCCCG

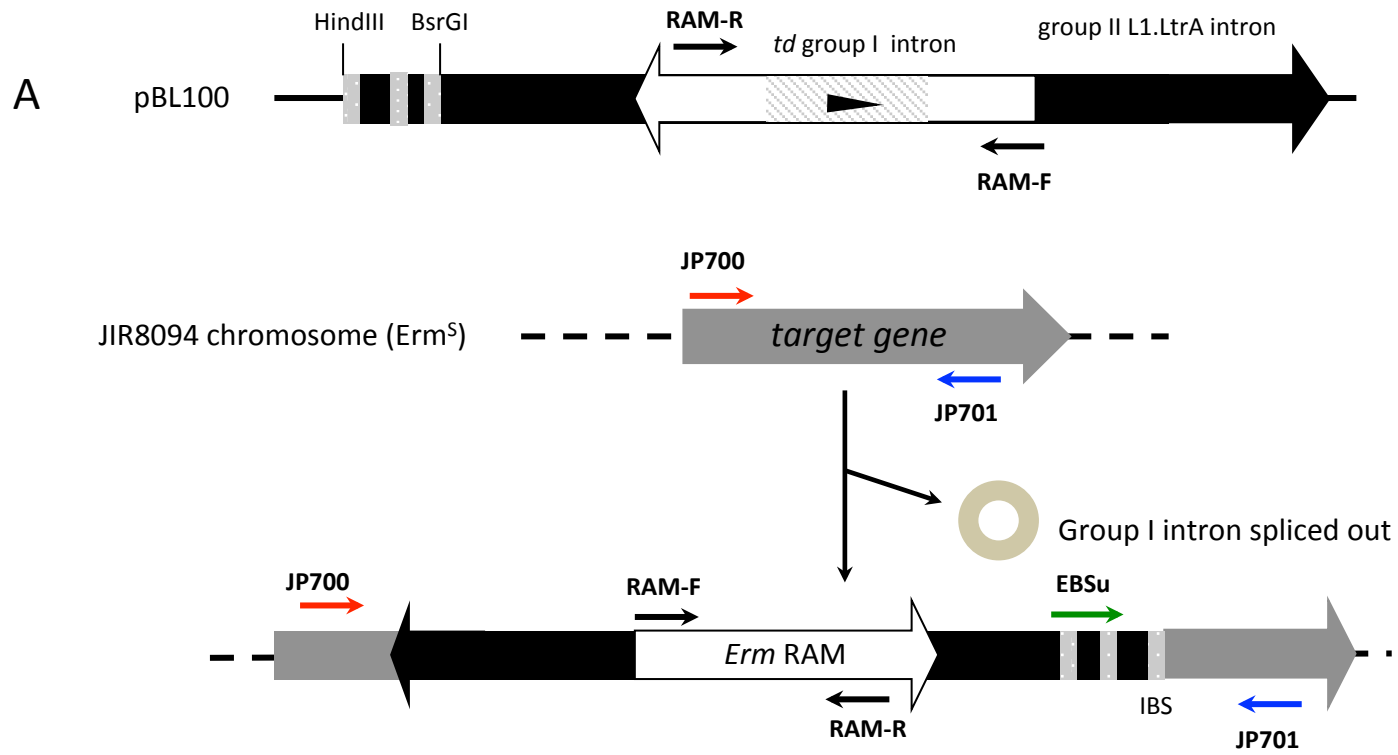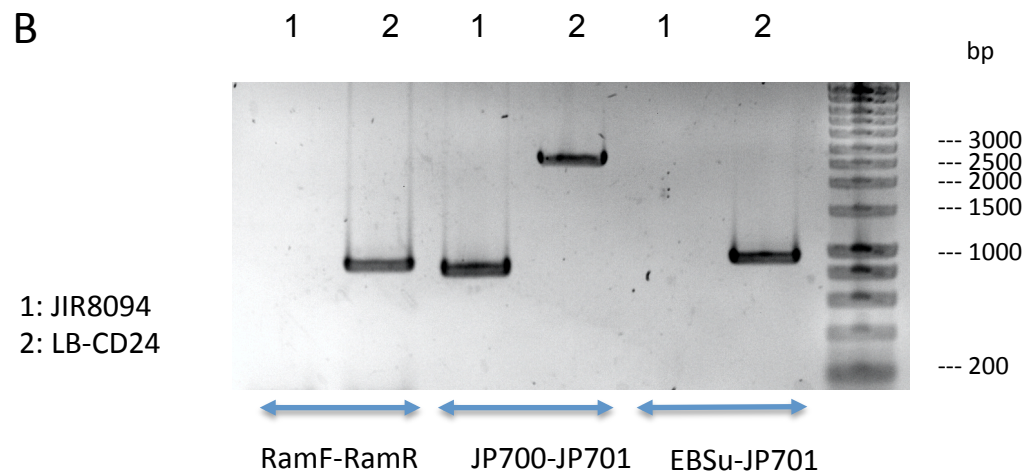

**Fig. S1: Construction the *C. difficile* *rex* mutants using the TargeTron system.**

**A** Schematic diagram of the TargeTron technology. The ClosTron delivery system encoded on plasmid pBL100 consists of a group-II intron (black arrow) with an internal Retrotransposition-Activated Marker (RAM) conferring erythromycin resistance (white arrow) that is itself interrupted by a *td* group-I intron (hatched box). The group-II intron is retargeted to the target gene (grey arrow) by altering the sequence of the IBS/EBS region using overlap PCR. Splicing the group-II intron into the target gene disrupts it, and splicing the *td* group-I intron of the *erm* RAM restores the functional *erm* gene, allowing positive selection of the mutants.

**B.** Confirmation of the mutant knockout by PCR. PCR using the primer pair Ram-F/Ram-R (lane 1 and 2, black arrows) was performed to confirm the splicing out of the group-I intron in the mutant. To verify the integration of the Ll.LtrB intron in the targeted gene, we performed PCR with three primer pairs: the intron primer EBSu associated with a primer within the *rex* gene (JP701), the RamF and RamR inside the *erm* cassette, and the two primers (JP700-JP701) flanking the insertion site in the targeted gene. Each PCR was performed on chromosomal DNA of the *rex* mutant and strain JIR8094 as a negative control. 1kb Ladder (Eurogentec) was used as a molecular-weight marker.

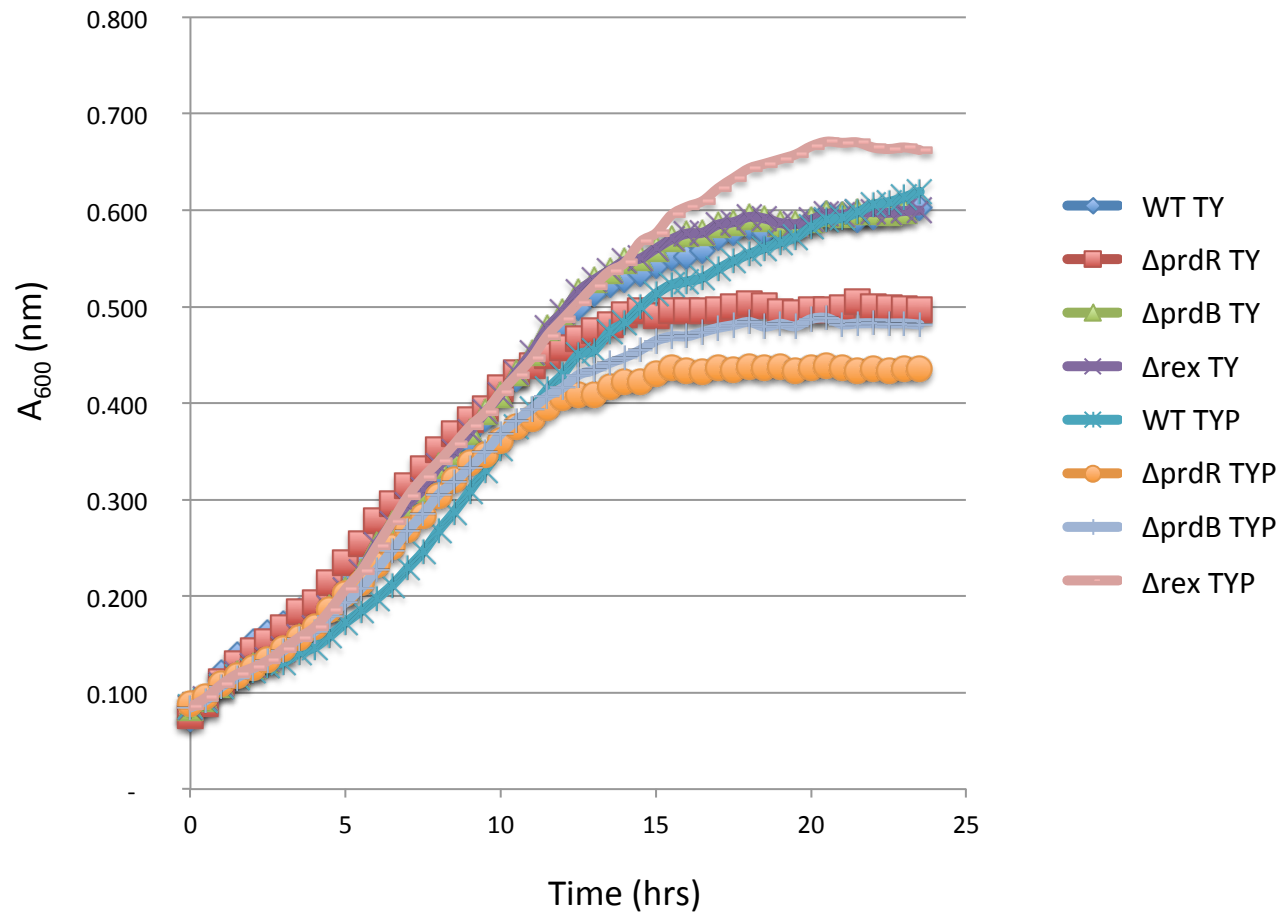

Supplementary Fig. 2: Growth curves of the JIR8094 strain and its respective *prdR*, *prdB* and *rex* mutants in both TY and TY supplemented with 30 mM L-proline (TYP)
